# Supplementary material for: Synergistic ternary porous CN–PPy–MMt nanocomposite for efficient photocatalytic metronidazole mineralization: performance, mechanism, and pathways
Source: Royal Society of Chemistry journal article supplement (doi:10.1039/d1en00254f), 2021-01-01

## Supporting information

### **Synergistic metal-free porous CN-PPy-MMt nanocomposite for efficient photocatalytic metronidazole mineralization performance, mechanism and pathways**

**Vellaichamy Balakumar<sup>1\*</sup>, Sekar Karthikeyan<sup>1</sup>, Chitiphon Chuaicham<sup>1</sup>, Ramalingam Manivannan<sup>2</sup>, and Keiko Sasaki<sup>1\*</sup>**

<sup>1</sup>Department of Earth Resources Engineering, Faculty of Engineering, Kyushu University, 744 Motooka, Nishiku, Fukuoka 819-0395, Japan

<sup>2</sup>Department of Advanced Organic Materials Engineering, Chungnam National University, 220 Gung-dong, Yuseong-gu, Daejeon 305-764, South Korea

Corresponding authors: \*

E-mail: [keikos@mine.kyushu-u.ac.jp](mailto:keikos@mine.kyushu-u.ac.jp), (Prof. Keiko Sasaki), Tel: +81-92-802-3338, ORCID id: <http://orcid.org/0000-0002-2882-0700> & [kumar@mine.kyushu-u.ac.jp](mailto:kumar@mine.kyushu-u.ac.jp) (Vellaichamy Balakumar)

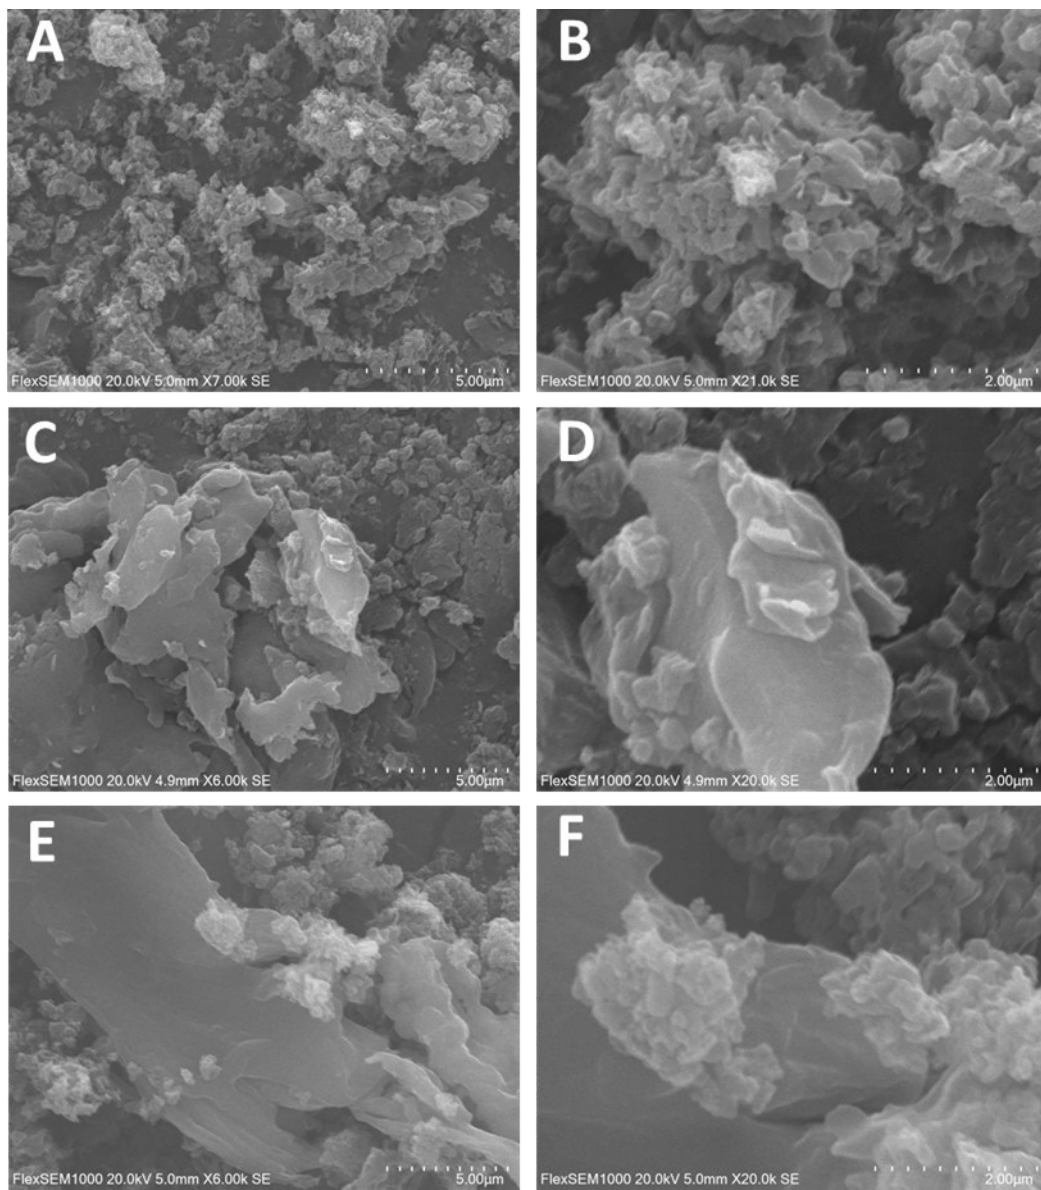

**Fig. S1** SEM images of (A-B) CN, (C-D) CN-PPy, and (E-F) CN-PPy-MMt (5%).

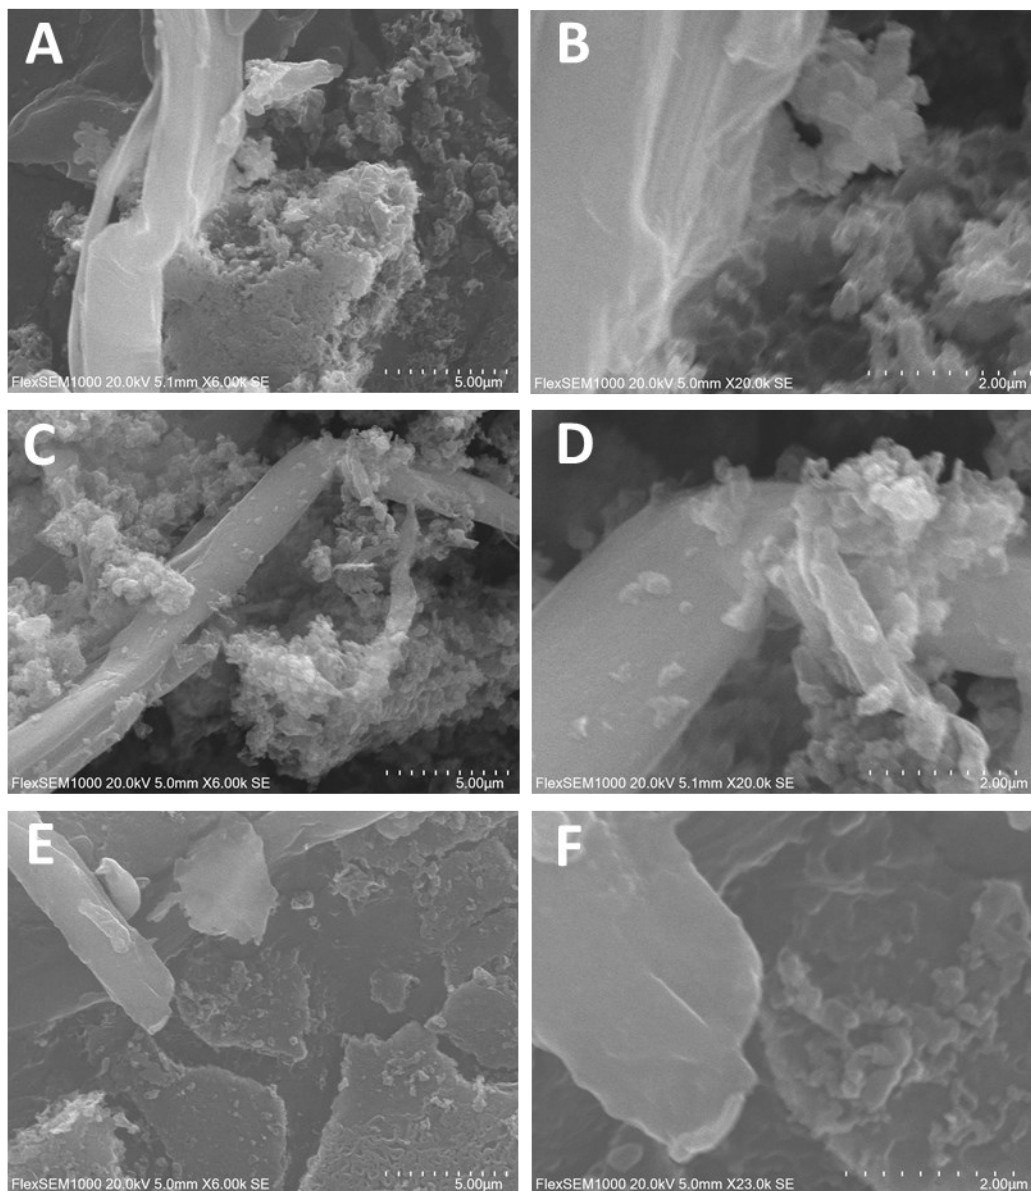

**Fig. S2** SEM images of (A-B) CN-PPy-MMt (10%), (C-D) CN-PPy-MMt (15%), and (E-F) CN-PPy-MMt (20%).

**Fig. S2** Mass spectra of (A) metronidazole and (C, D) various photocatalytic mineralization

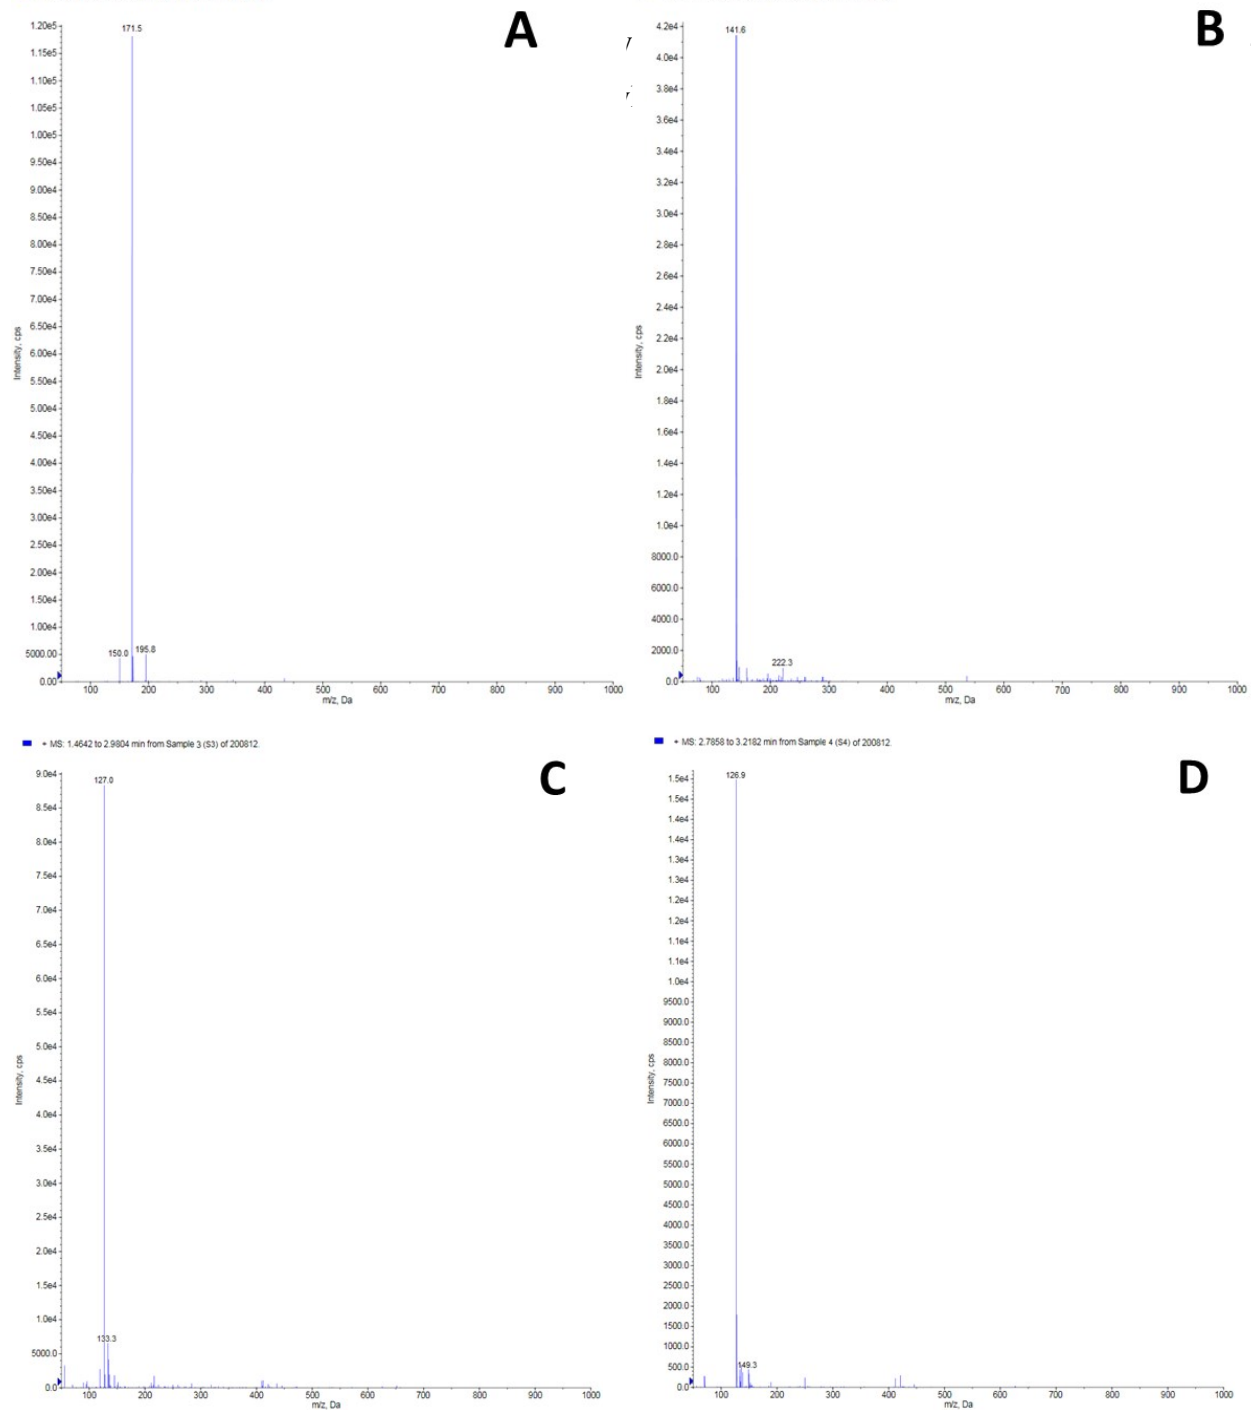

Supplement: d1en00254f1.pdf [file d1en00254f1.pdf]
